# Supplementary material
Source: publisher figshare collection journal article supplement (https://diabetesjournals.figshare.com/ndownloader/files/31689632)
Supplement: Supplementary file 1 [file 31689632]

## Sheet: Sheet1
Supplementary Table 8. Metabolites associated with WHRadjBMI in females from PIVUS (N=487) and TwinGene (N=879) and three metabolites associated with WHRadjBMI in males from ULSAM (N=1112), PIVUS (N=483) and TwinGene (N=1167). Alternate exposures were WC adjusted for height and weight; Hip adjusted for height and weight, and WHR. All analysis was adjusted for age.
	WHRadjBMI				WC(adj height and weight)				WHR unadjusted for BMI				Hip (adj height and weight)
Females	PIVUS (Discovery)		TwinGene (Replication estimates)		PIVUS (Discovery)		TwinGene (Replication estimates)		PIVUS (Discovery)		TwinGene (Replication estimates)		PIVUS (Discovery)		TwinGene (Replication estimates)
Metabolite	Beta (95% CIs)	P	Beta (95% CIs)	P	Beta (95% CIs)	P	Beta (95% CIs)	P	Beta (95% CIs)	P	Beta (95% CIs)	P	Beta (95% CIs)	P	Beta (95% CIs)	P
Amino Acids and Derivatives
L-Proline	2.55 (0.89, 4.22)	0.00273921	1.20 (0.30, 2.10)	0.01	0.02 (0.01, 0.04)	0.008	0.02 (0.00, 0.03)	0.016	3.07 (1.64, 4.50)	3.146e-05	2.07 (0.64, 3.51)	8.9e-05	-0.01 (-0.04, 0.01)	0.37	-0.01 (-0.03, 0.00)	0.1
Bile Acid
Hyodeoxycholic acid	3.69 (2.03, 5.34)	1.536e-05	0.72 (0.04, 1.39)	0.0369698	0.03 (0.01, 0.04)	0.002	0.01 (-0,00, 0.02)	0.16	3.48 (2.06, 4.90)	2.211e-06	1.26 (-0.17, 2.68)	0.0001995	-0.03 (-0.05, -0.00)	0.018	-0.01 (-0.02, 0.00)	0.24
Glycerolipids
Monoacylglycerol(20:5)	2.67 (0.95, 4.39)	0.00247925	0.81 (0.04, 1.58)	0.039	0.02 (0.00, 0.04)	0.016	0.01 (-0.00, 0.02)	0.23	3.06 (1.58, 4.54)	5.987e-05	1.27 (-0.22, 2.75)	0.00107	-0.01 (-0.01, 0.02)	0.48	-0.01 (-0.02, 0.00)	0.17
Monoacylglycerol(18:2)	2.64 (0.84, 4.44)	0.00413882	1.53 (0.62, 2.44)	0.00107348	0.02 (-0.00, 0.04)	0.076	0.02 (0.01, 0.03)	8.3e-05	3.19 (1.64, 4.73)	6.291e-05	2.16 (0.62, 3.71)	8.03e-06	-0.02 (-0.05, 0.00)	0.08	-0.01 (-0.02, 0.01)	0.32
Monoacylglycerol(14:0)	3.18 (1.41, 4.94)	0.00046578	1.64 (0.79, 2.50)	0.00017	0.02 (-0.00, 0.04)	0.051	0.03 (0.02, 0.04)	1.62e-07	2.59 (1.07, 4.11)	0.00092206	2.27 (0.75, 3.79)	6.93e-06	-0.04 (-0.06, -0.01)	0.007	-0.01 (-0.02, 0.00)	0.25
Diacylglycerol(34:1)	3.57 (1.88, 5.26)	4.191e-05	0.91 (0.02, 1.81)	0.0444145	0.03 (0.01, 0.05)	0.0018825	0.02 (0.00, 0.04)	0.0002734	4.13 (2.67, 5.58)	4.784e-08	1.58 (0.12, 3.03)	0.0021447	-0.02 (-0.05, -0.00)	0.05	0.00 (-0.01, 0.01)	0.93
Monoacylglycerol(18:1)	3.84 (2.08, 5.59)	2.299e-05	1.75 (0.83, 2.67)	0.00025	0.03 (0.01, 0.05)	0.0014722	0.03 (0.01, 0.04)	5.05e-06	4.00 (2.49, 5.51)	3.2e-07	2.39 (0.88, 3.91)	1.82e-06	-0.02 (-0.05, 0.00)	0.065	-0.01 (-0.02, 0.01)	0.33
Monoacylglycerol(16:1)	3.01 (1.24, 4.77)	0.00089842	1.46 (0.52, 2.39)	0.0024	0.03 (0.01, 0.05)	0.004	0.03 (0.02, 0.04)	4.64e-07	3.65 (2.13, 5.17)	3.402e-06	3.0 (0.58, 3.62)	3.16e-05	-0.01 (-0.04, 0.02)	0.43	0.00 (-0.01, 0.01)	0.88
Monoacylglycerol(16:0)	3.74 (1.96, 5.51)	4.41e-05	1.92 (1.01, 2.82)	4e-05	0.03 (0.01, 0.05)	0.003	0.03 (0.02, 0.04)	2.71e-08	3.39 (1.86, 4.92)	1.688e-05	2.8 (1.14, 4.20)	2.53e-07	-0.03 (-0.05, -0.00)	0.05	-0.01 (-0.02, 0.00)	0.18
Peptides
Gamma-Glutamyl-leucine	2.73 (1.25, 4.21)	0.00034419	1.40 (0.67, 2.13)	0.00018448	0.02 (0.01, 0.00)	0.004	0.01 (-0.00, 0.02)	0.086	3.43 (2.15, 4.71)	2.294e-07	2.0 (0.70, 3.26)	4.55e-07	-0.01 (-0.03, 0.01)	0.23	-0.02 (-0.03, -0.00)	0.011
Sphingomyelins
Sphingomyelin(32:2)	-2.46 (-3.78, -1.14)	0.00029779	-0.71 (-1.30, -0.12)	0.01868	-0.01 (-0.03, 0.00)	0.07	-0.00 (-0.01, 0.01)	0.69	-0.80 (-1.97, 0.36)	0.18	-0.07 (-0.70, 0.55)	0.82	0.03 (0.01, 0.05)	0.002	0.02 (0.01, 0.03)	0.0004
Males
Amino Acids and Derivatives
Creatine	3.06 (1.44, 4.67)	0.00020315	1.40 (0.60, 2.20)	0.00061912	.038 (0.02, 0.06)	2.33e-05	0.04 (0.02, 0.05)	1.73e-05	3.57 (2.34, 4.39)	1.47e-08	1.9 (1.05, 2.69)	8.525e-06	0.007 (-0.01, 0.03)	0.56	0.01 (-0.01, 0.02)	0.48
Cinnamic Acid and Derivates
C12H14O5	-2.09 (-3.17, -1.01)	0.00014649	-0.89 (-1.73, -0.06)	0.0364163	-0.02 (-0.03, -0.01)	0.003	-0.02 (-0.04, -0.01)	0.007	-2.05 (-2.91, -1.19)	2.962e-06	-1.2 (-2.14, -0.33)	0.00734139	0.007 (-0.01, 0.02)	0.32	-0.00 (-0.01, 0.01)	0.82
Steroids and Steroid Derivatives
Dehydroepiandrosterone sulfate (sodium salt)	-1.92 (-3.00, -0.85)	0.00043258	-1.22 (-2.03, -0.40)	0.00367762	-0.02 (-0,03, -0.01)	0.0002705	-0.02 (-0.03, -0.01)	0.0001886	-2.38 (-3.34, -1.53)	4.866e-08	-1.8 (-2.74, -0.96)	5.232e-05	-0.00 (-0.01, 0.01)	0.97	0.00 (-0.01, 0.01)	0.74
